# Supplementary material for: IonQuant Enables Accurate and Sensitive Label-Free Quantification With FDR-Controlled Match-Between-Runs
Source: PubMed Central journal article supplement (PMC8131922; doi:10.1016/j.mcpro.2021.100077), 2021-04-02
Supplement: mmc1.pdf [file mmc1.pdf]

**Supplemental Figures for**  
**“IonQuant enables accurate and sensitive label-free quantification with FDR-  
controlled match-between-runs”**

Fengchao Yu<sup>1</sup>, Sarah E. Haynes<sup>1</sup>, Alexey I. Nesvizhskii<sup>1,2\*</sup>

<sup>1</sup>Department of Pathology, University of Michigan, Ann Arbor, Michigan, USA

<sup>2</sup>Department of Computational Medicine and Bioinformatics, University of Michigan, Ann Arbor,  
Michigan, USA

\* Correspondence to A.I.N. (nesvi@med.umich.edu)

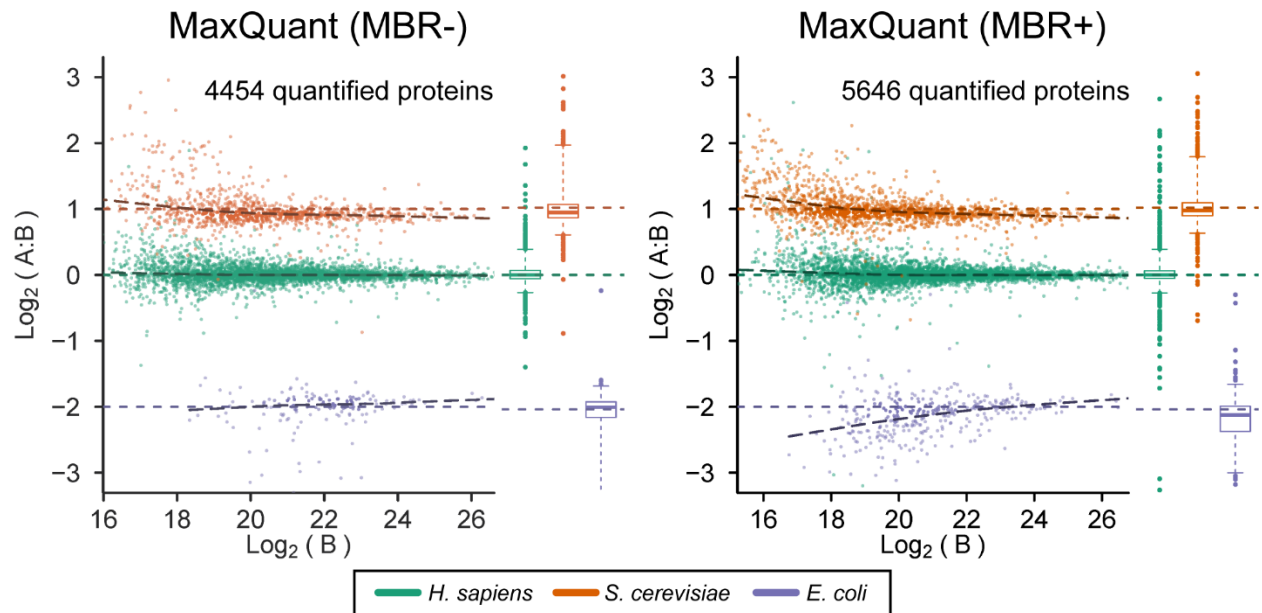

**Figure S1.** Ground-truth protein quantification results from MaxQuant (version 1.6.14.0) with parameters similar to those used in MSFragger and IonQuant. “MBR+” and “MBR-” indicate the analysis was performed with and without match-between-runs (MBR), respectively. *S. cerevisiae* proteins are shown in orange, *H. sapiens* in green, and *E. coli* in purple. The true ratios of condition A over condition B are 2:1 (*S. cerevisiae*), 1:1 (*H. sapiens*), and 1:4 (*E. coli*). The horizontal colored dashed lines (orange, green, and purple) indicate the true ratios. The black dashed lines are fitted curves from observed ratios. Box plots of the intensities are shown to the right of each scatter plot panel.

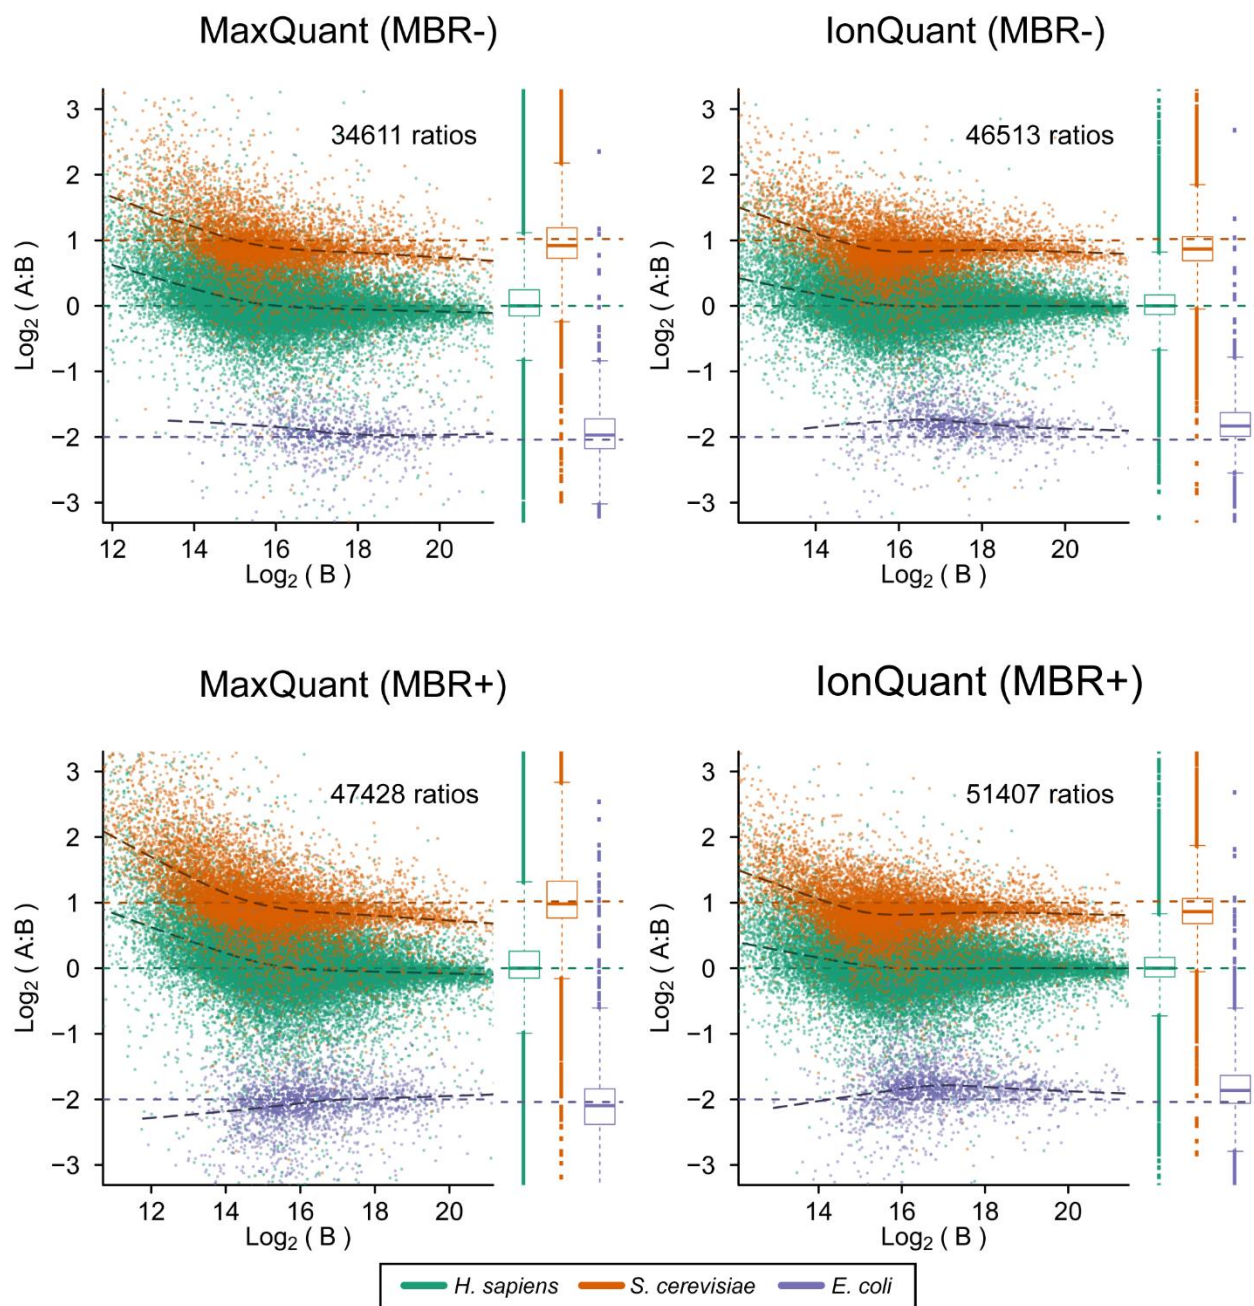

**Figure S2.** Ground-truth ion quantification results from MaxQuant (version 1.6.14.0) and IonQuant from a mixture of three different proteomes. “MBR+” and “MBR-” indicate that the analysis was performed with and without match-between-runs (MBR), respectively. *S. cerevisiae* proteins are shown in orange, *H. sapiens* in green, and *E. coli* in purple. The known ratios of condition A over condition B are 2:1 (*S. cerevisiae*), 1:1 (*H. sapiens*), and 1:4 (*E. coli*). The horizontal colored dashed lines (orange, green, and purple) indicate the true ratios. The black dashed lines are fitted curves from observed ratios. Box plots of the intensities are shown to the right of each scatter plot panel. The intensities from both tools are not normalized.

|    | File                                                                        | Exists | Size     | Data format | Parameter group | Experiment    | Fraction | PTM   | Reference channels |
|----|-----------------------------------------------------------------------------|--------|----------|-------------|-----------------|---------------|----------|-------|--------------------|
| 1  | F:\data\PXD022791\split\FAIMS_2CV_OTIT_HCD_300ITMS2_Blank_1_-55.mzXML       | True   | 213.8 MB | MzXml file  | Group 0         | blank_1       | 1        | False |                    |
| 2  | F:\data\PXD022791\split\FAIMS_2CV_OTIT_HCD_300ITMS2_Blank_1_-70.mzXML       | True   | 117.2 MB | MzXml file  | Group 0         | blank_1       | 3        | False |                    |
| 3  | F:\data\PXD022791\split\FAIMS_2CV_OTIT_HCD_300ITMS2_Blank_2_-55.mzXML       | True   | 176.2 MB | MzXml file  | Group 0         | blank_2       | 1        | False |                    |
| 4  | F:\data\PXD022791\split\FAIMS_2CV_OTIT_HCD_300ITMS2_Blank_2_-70.mzXML       | True   | 96.2 MB  | MzXml file  | Group 0         | blank_2       | 3        | False |                    |
| 5  | F:\data\PXD022791\split\FAIMS_2CV_OTIT_HCD_300ITMS2_Blank_3_-55.mzXML       | True   | 163.9 MB | MzXml file  | Group 0         | blank_3       | 1        | False |                    |
| 6  | F:\data\PXD022791\split\FAIMS_2CV_OTIT_HCD_300ITMS2_Blank_3_-70.mzXML       | True   | 77.4 MB  | MzXml file  | Group 0         | blank_3       | 3        | False |                    |
| 7  | F:\data\PXD022791\split\FAIMS_2CV_OTIT_HCD_300ITMS2_Single_HeLa_1_-55.mzXML | True   | 286.8 MB | MzXml file  | Group 0         | single_hela_1 | 1        | False |                    |
| 8  | F:\data\PXD022791\split\FAIMS_2CV_OTIT_HCD_300ITMS2_Single_HeLa_1_-70.mzXML | True   | 171.1 MB | MzXml file  | Group 0         | single_hela_1 | 3        | False |                    |
| 9  | F:\data\PXD022791\split\FAIMS_2CV_OTIT_HCD_300ITMS2_Single_HeLa_2_-55.mzXML | True   | 309.2 MB | MzXml file  | Group 0         | single_hela_2 | 1        | False |                    |
| 10 | F:\data\PXD022791\split\FAIMS_2CV_OTIT_HCD_300ITMS2_Single_HeLa_2_-70.mzXML | True   | 203.2 MB | MzXml file  | Group 0         | single_hela_2 | 3        | False |                    |
| 11 | F:\data\PXD022791\split\FAIMS_2CV_OTIT_HCD_300ITMS2_Single_HeLa_3_-55.mzXML | True   | 305.7 MB | MzXml file  | Group 0         | single_hela_3 | 1        | False |                    |
| 12 | F:\data\PXD022791\split\FAIMS_2CV_OTIT_HCD_300ITMS2_Single_HeLa_3_-70.mzXML | True   | 192.3 MB | MzXml file  | Group 0         | single_hela_3 | 3        | False |                    |
| 13 | F:\data\PXD022791\split\FAIMS_2CV_OTIT_HCD_300ITMS2_100cell_1_-55.mzXML     | True   | 430.5 MB | MzXml file  | Group 0         | library       | 1        | False |                    |
| 14 | F:\data\PXD022791\split\FAIMS_2CV_OTIT_HCD_300ITMS2_100cell_1_-70.mzXML     | True   | 289.9 MB | MzXml file  | Group 0         | library       | 3        | False |                    |
| 15 | F:\data\PXD022791\split\FAIMS_2CV_OTIT_HCD_300ITMS2_100cell_2_-55.mzXML     | True   | 408.4 MB | MzXml file  | Group 0         | library       | 1        | False |                    |
| 16 | F:\data\PXD022791\split\FAIMS_2CV_OTIT_HCD_300ITMS2_100cell_2_-70.mzXML     | True   | 284.3 MB | MzXml file  | Group 0         | library       | 3        | False |                    |
| 17 | F:\data\PXD022791\split\FAIMS_2CV_OTIT_HCD_300ITMS2_100cell_3_-55.mzXML     | True   | 399.6 MB | MzXml file  | Group 0         | library       | 1        | False |                    |
| 18 | F:\data\PXD022791\split\FAIMS_2CV_OTIT_HCD_300ITMS2_100cell_3_-70.mzXML     | True   | 270.8 MB | MzXml file  | Group 0         | library       | 3        | False |                    |

**Figure S3.** A screenshot of the MaxQuant data annotation page for the single-cell FAIMS data. The files with compensation voltage equal to -55 V was set to fraction 1, and the files with compensation voltage equal to -70 V was set to fraction 3. Files from the same run were set to the same experiment.
